# Supplementary figures and images for: Identification of PANoptosis-Based Prognostic Signature for Predicting Efficacy of Immunotherapy and Chemotherapy in Hepatocellular Carcinoma
Source: Hindawi journal article supplement (doi:10.1155/2023/6879022), 2023-06-05

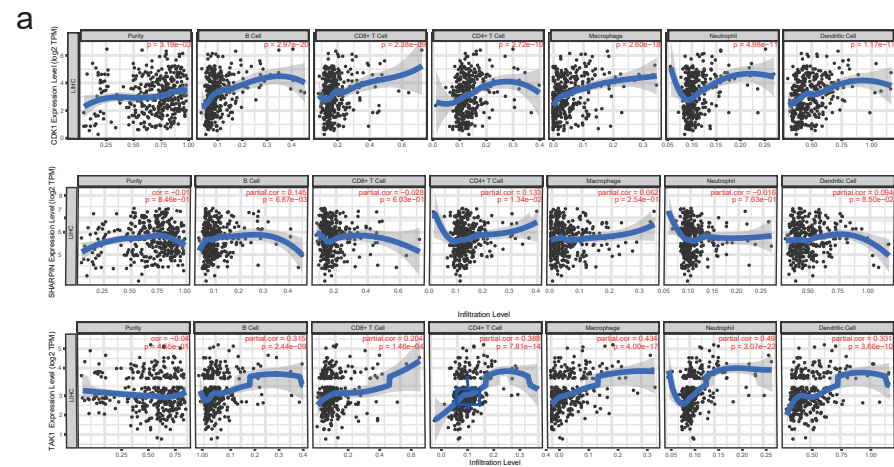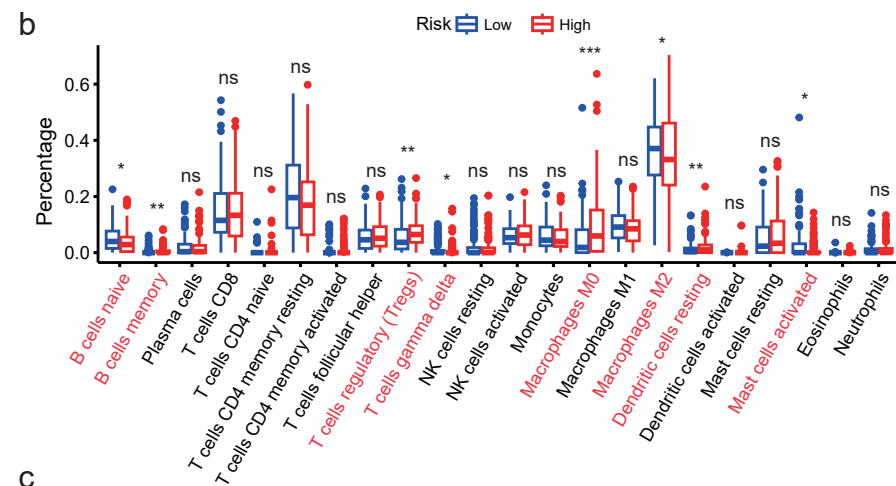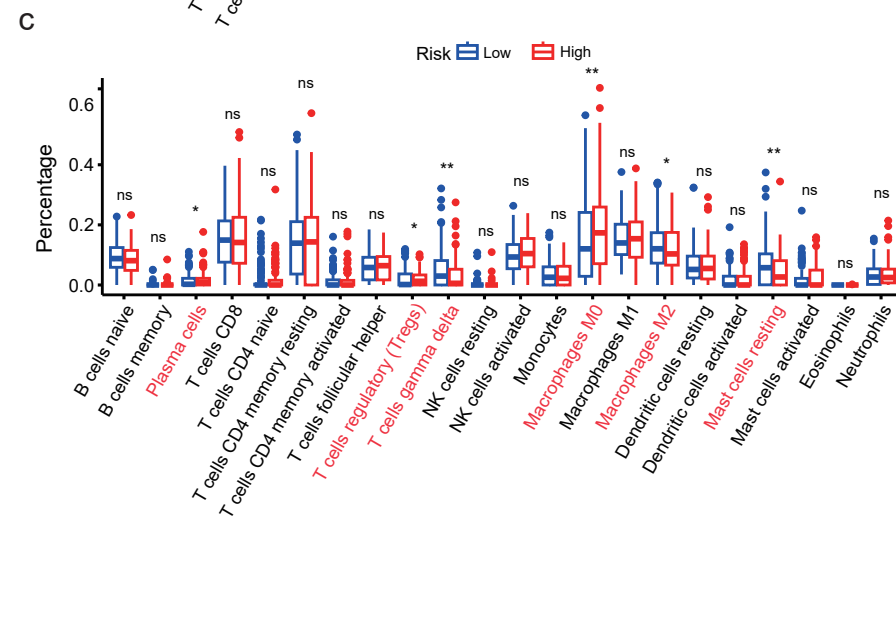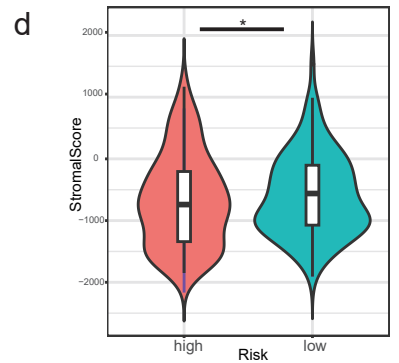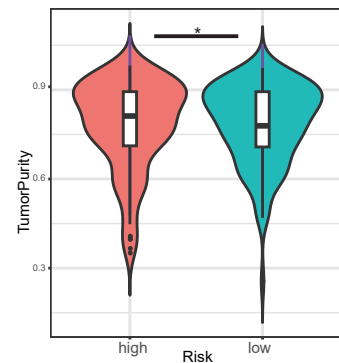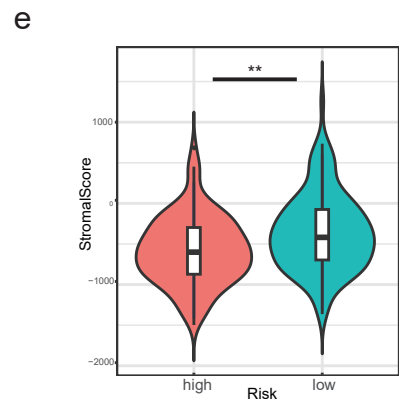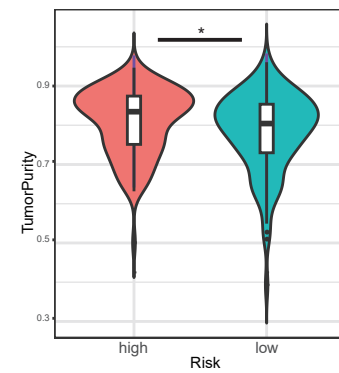

Supplement: f1 [file 6879022.f1.zip]

**a**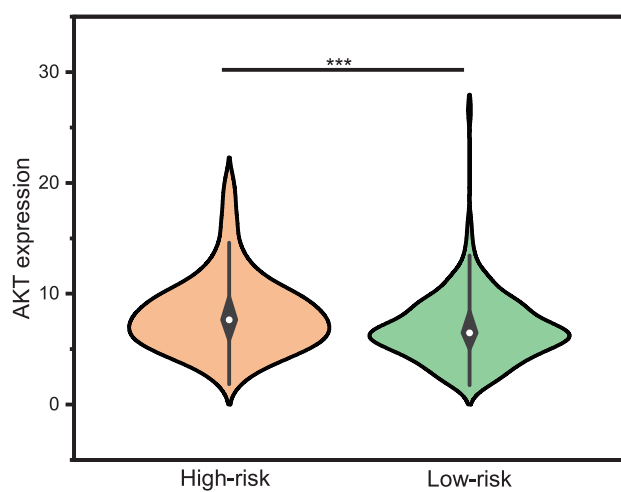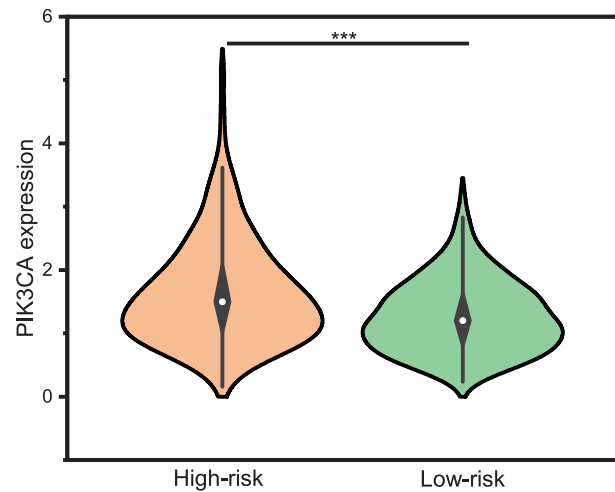**b**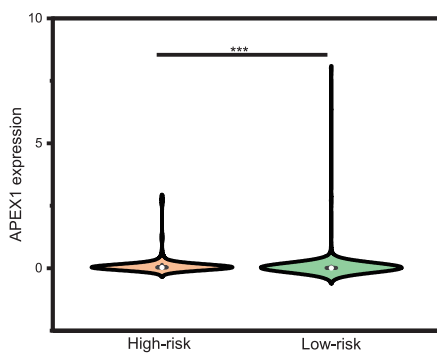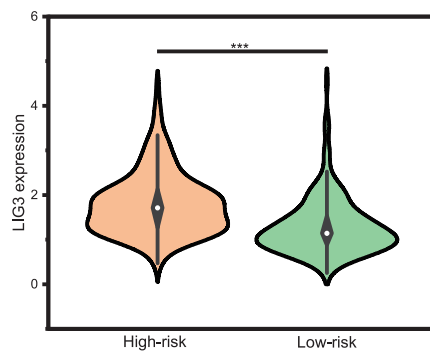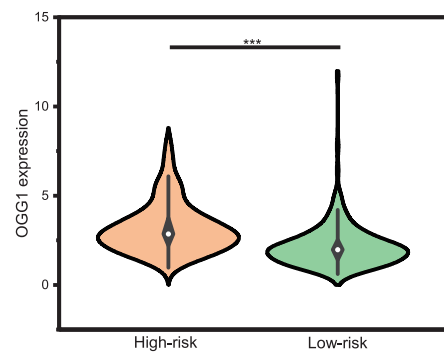**c**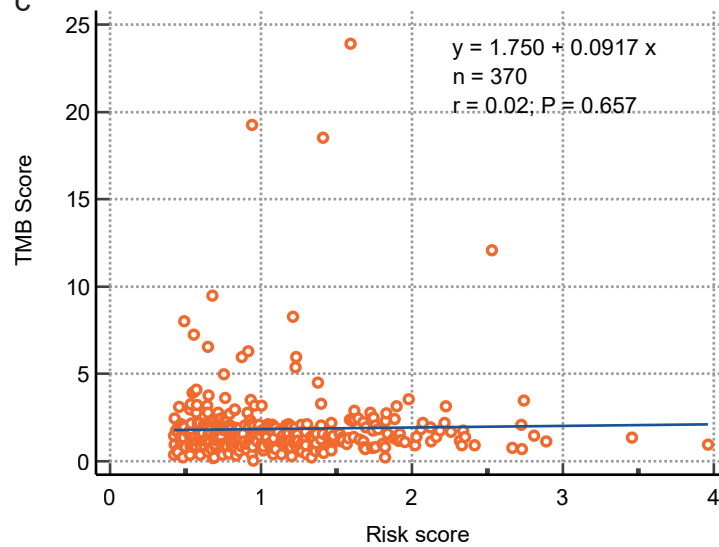

Supplement: f1 [file 6879022.f1.zip]

**a**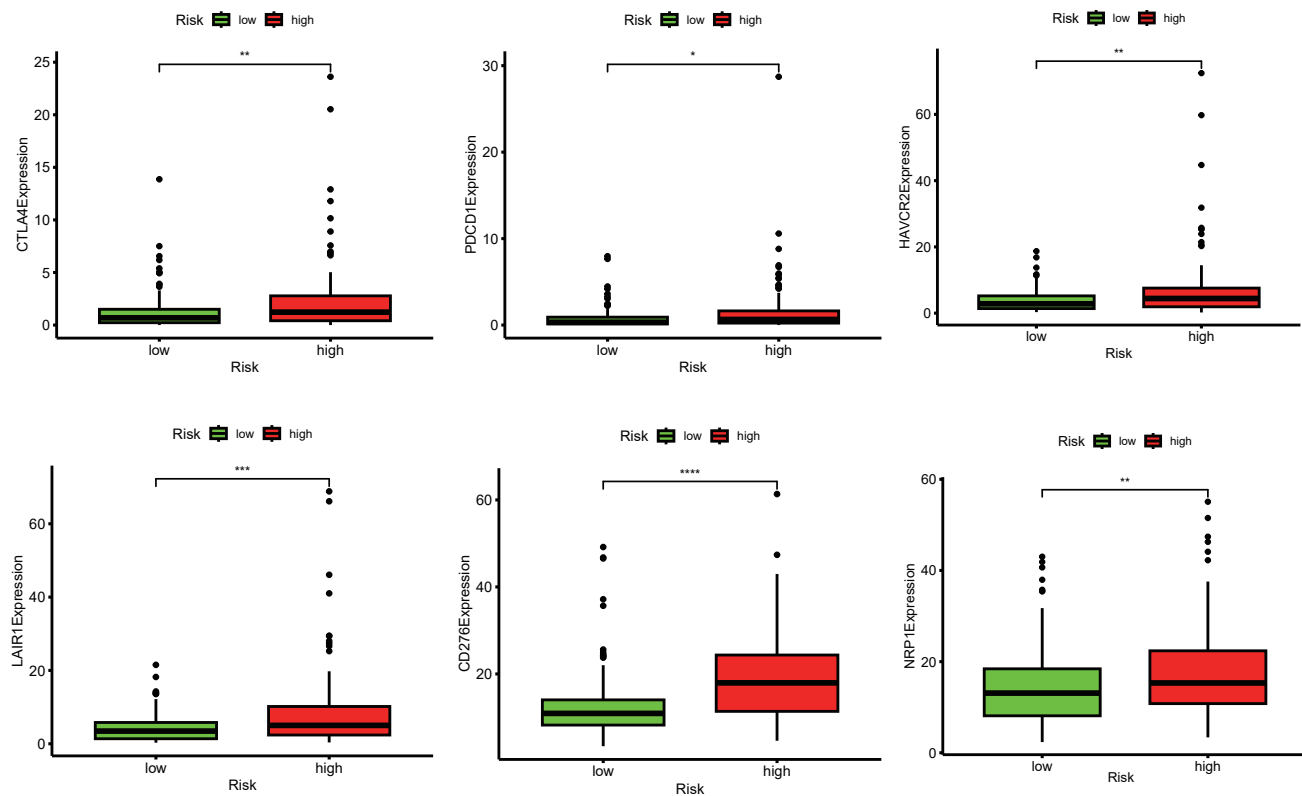**b**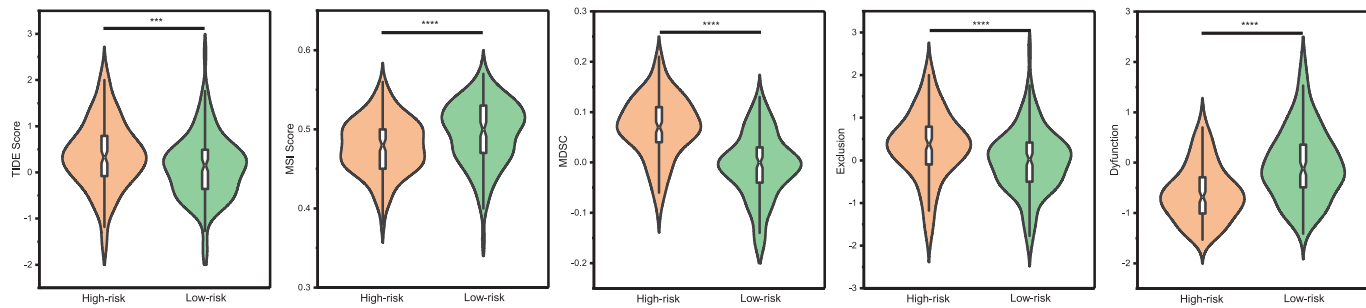**c**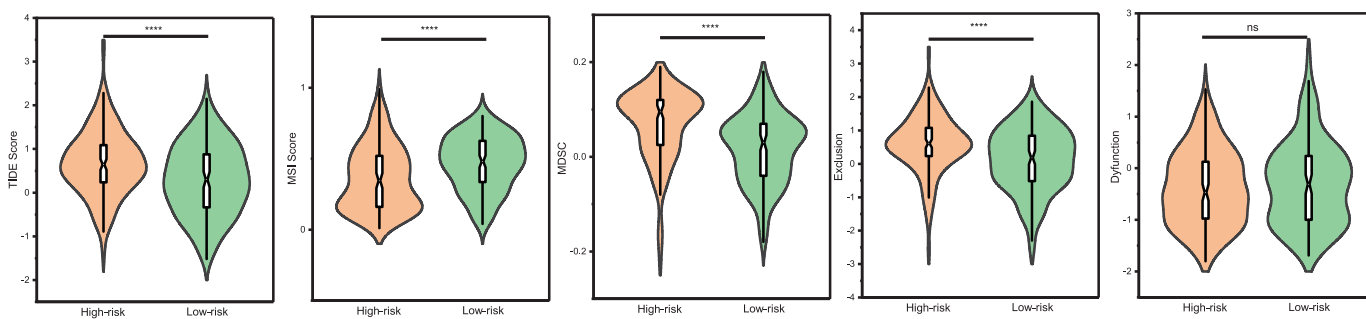

Supplement: f1 [file 6879022.f1.zip]

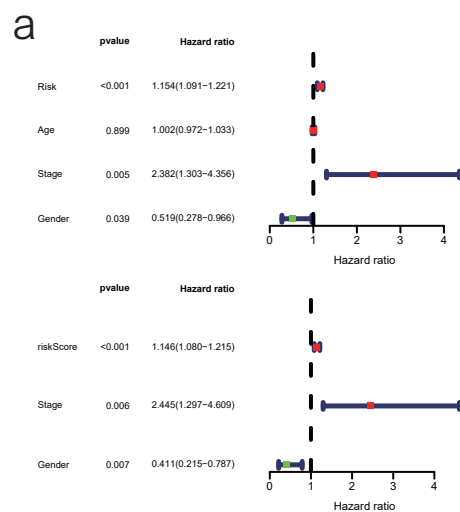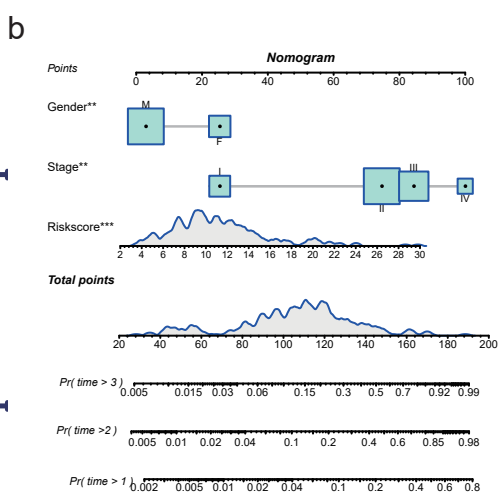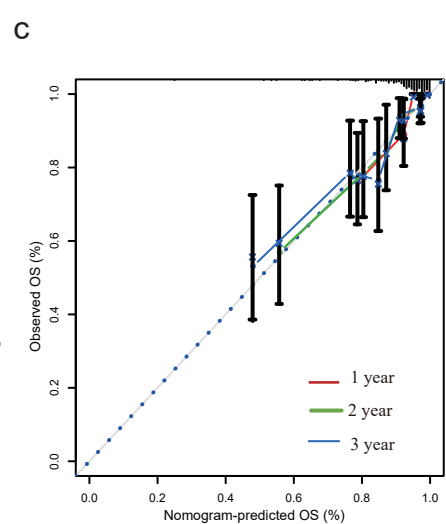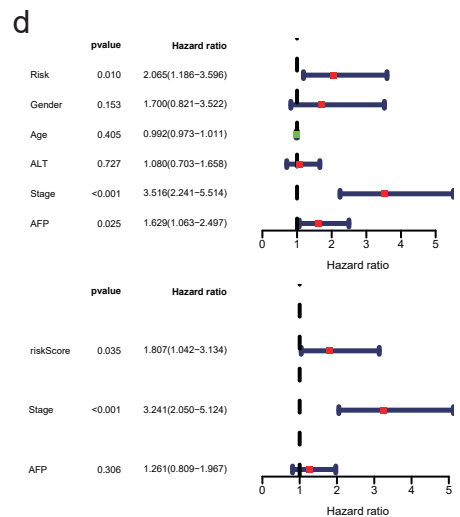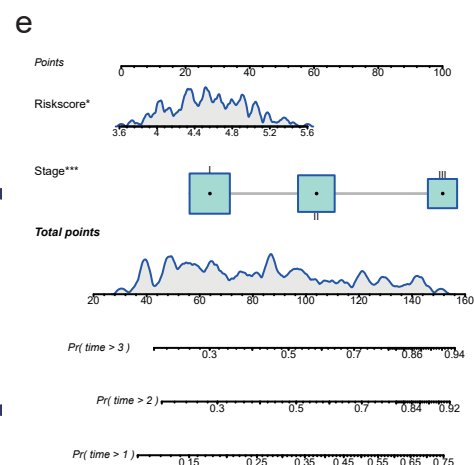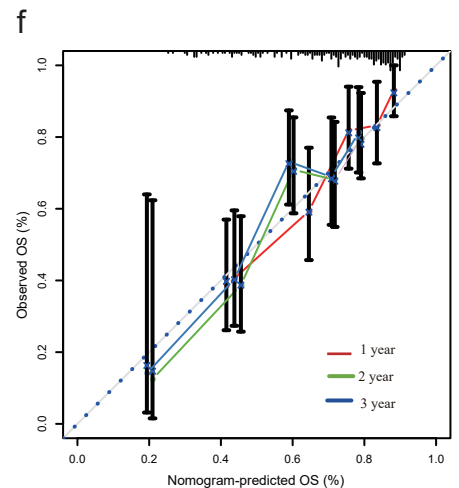

Supplement: f1 [file 6879022.f1.zip]

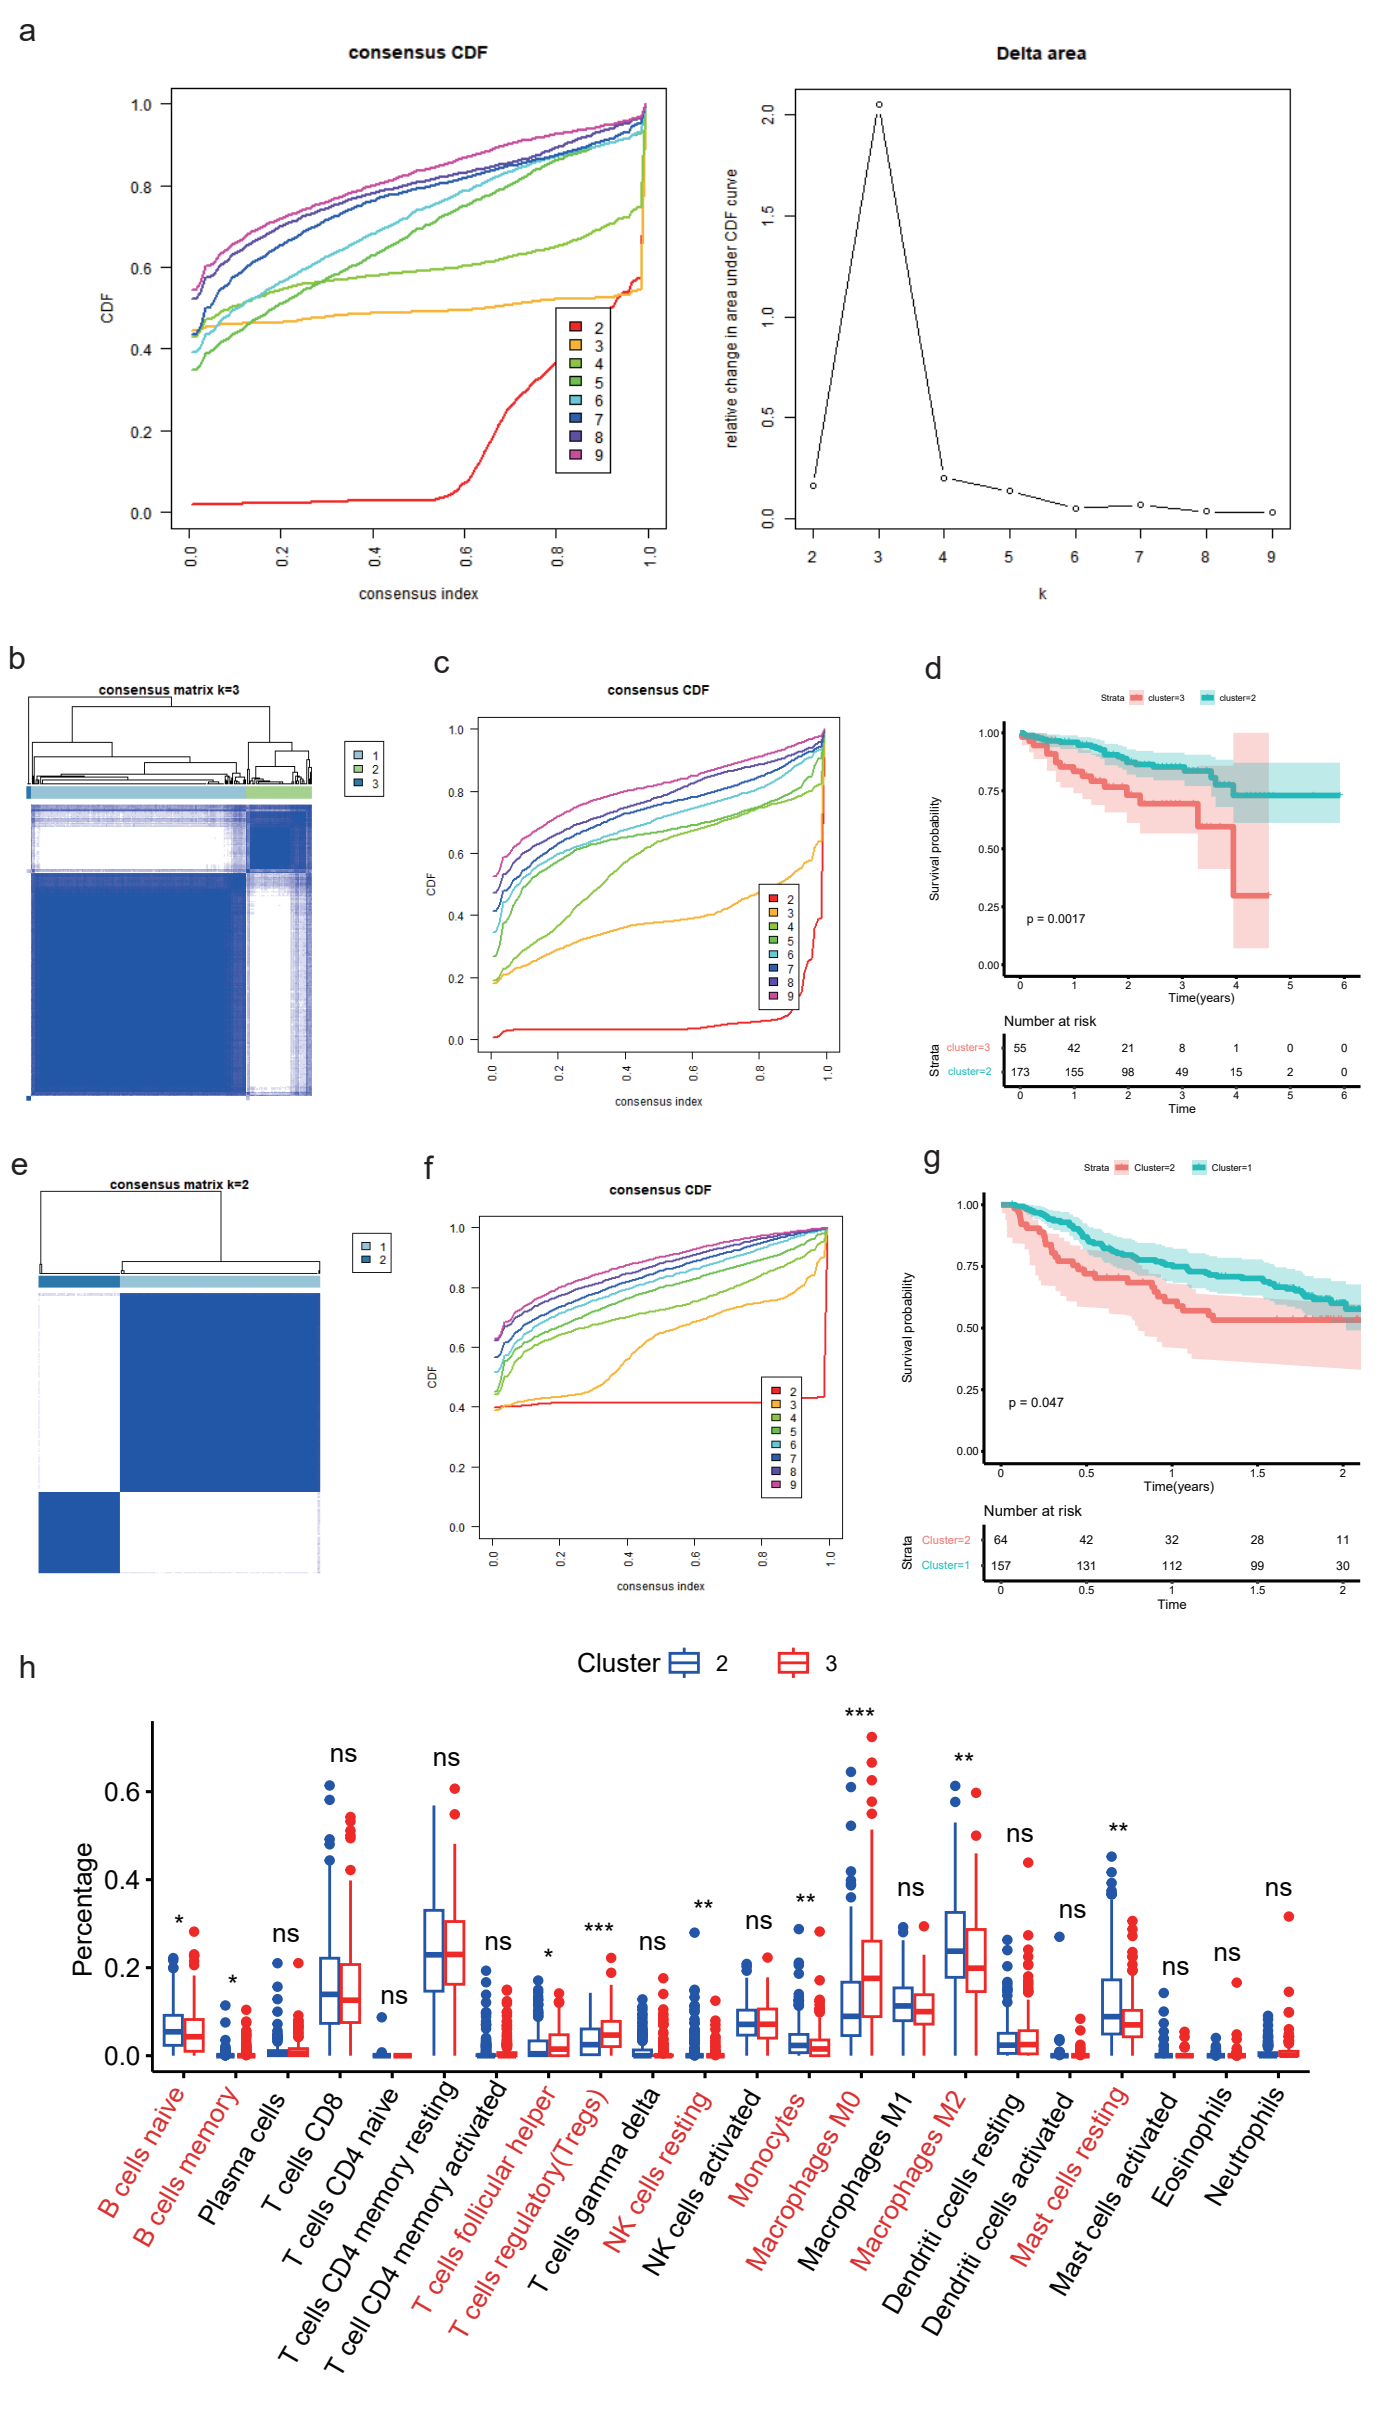

Supplement: f1 [file 6879022.f1.zip]
